# Supplementary material for: IFN-γ-Secreting-Mesenchymal Stem Cells Exert an Antitumor EffectIn Vivovia the TRAIL Pathway
Source: Hindawi journal article supplement (doi:10.1155/2014/318098), 2014-01-01
Supplement: f1 [file 318098.f1.pdf]

Figure S1 The immunophenotype, differentiation potential and proliferation property between MSCs and MSCs IFN- $\gamma$  were compared. (A) The immunophenotype of hMSCs and MSCs IFN- $\gamma$  were analyzed by FACS. (B) The adipogenic and Osteogenic differentiation of MSCs and MSCs IFN- $\gamma$  were assessed by oil red O staining and alizarin red S staining, respectively. (Magnification X200). (C) The proliferation potential of the same quantity of MSCs and MSCs IFN- $\gamma$  within 48 h were evaluated by CCK-8 kit.

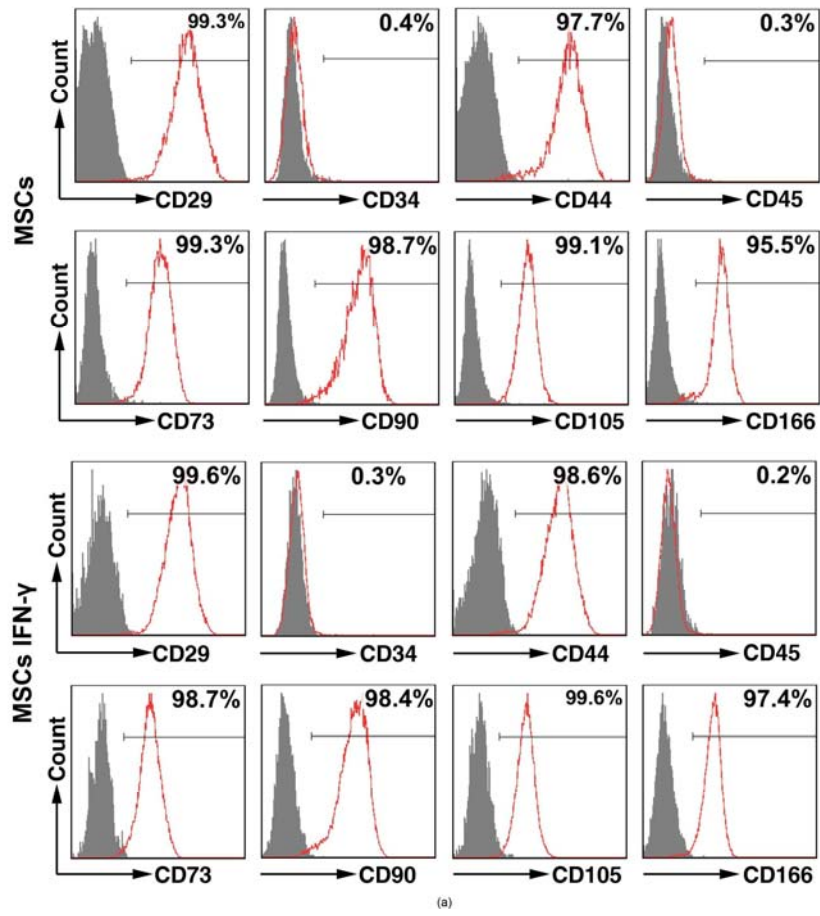

(a)

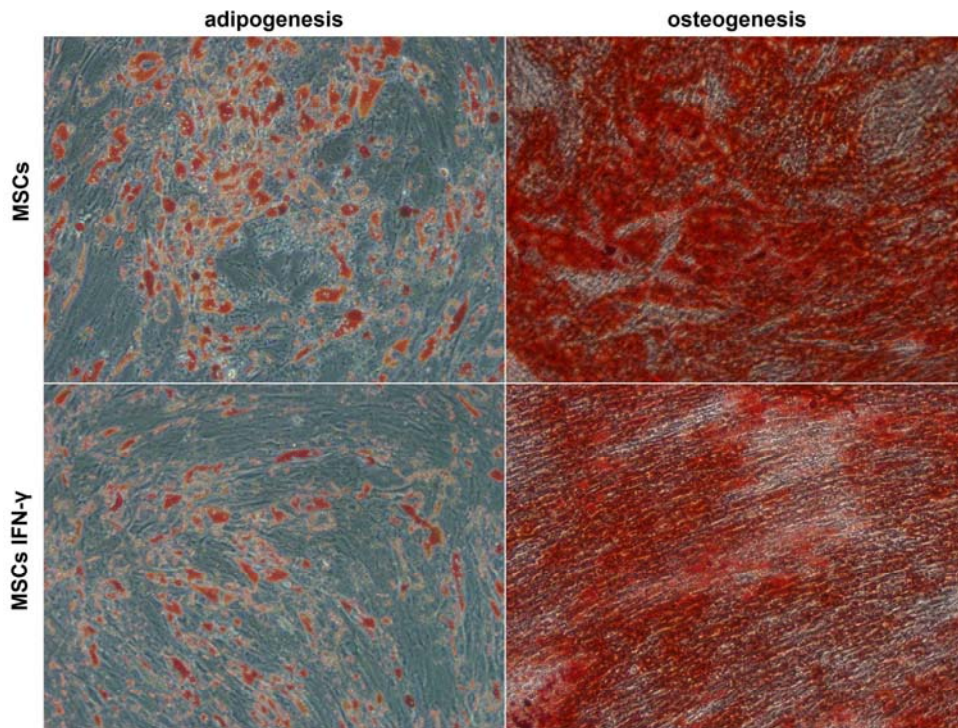

(b)

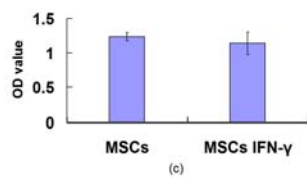

(c)
